# Supplementary material for: Cryptic diversity within the Poecilochirus carabi mite species complex phoretic on Nicrophorus burying beetles: phylogeny, biogeography, and host specificity
Source: bioRxiv or medRxiv preprint supplement (doi:10.1101/2021.05.20.443311), 2021-05-22
Supplement: Supplementary file [file media-4.pdf]

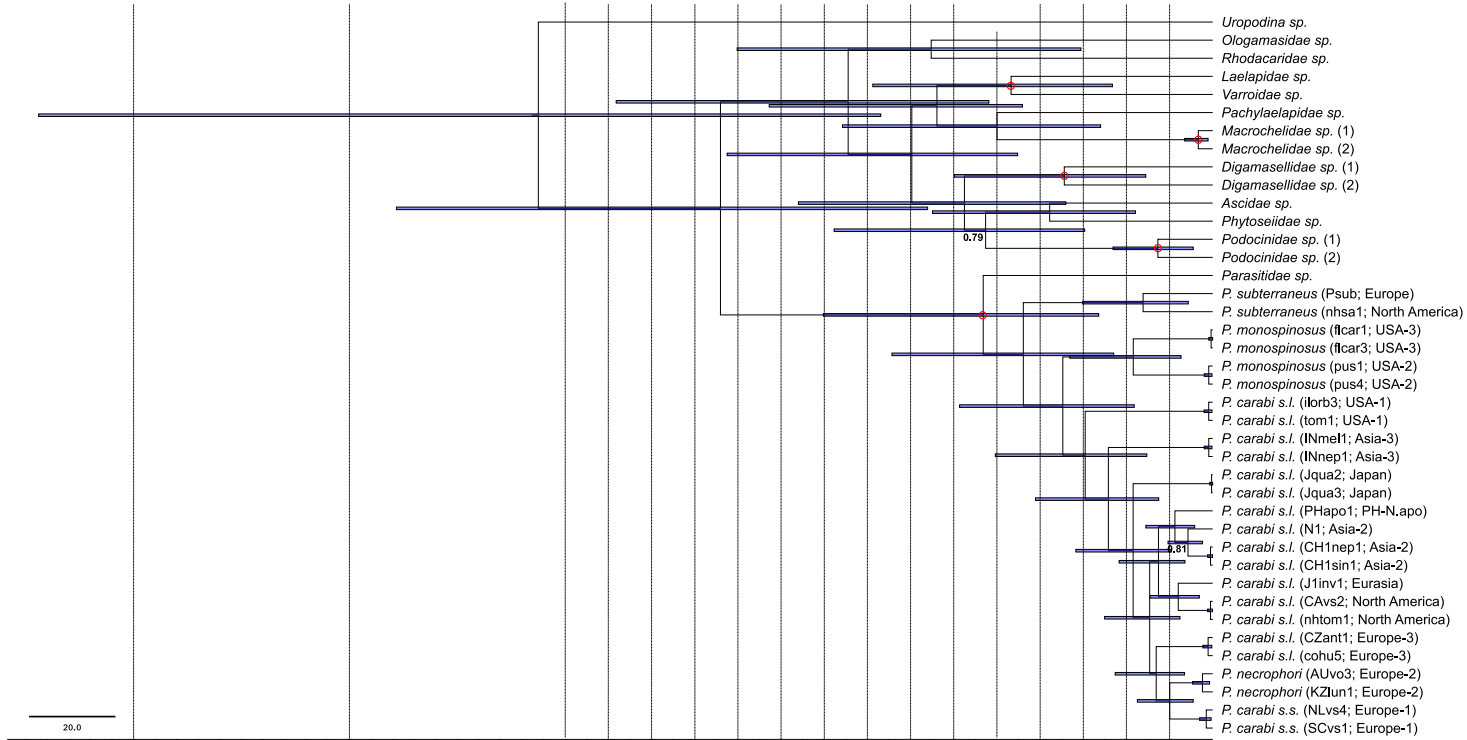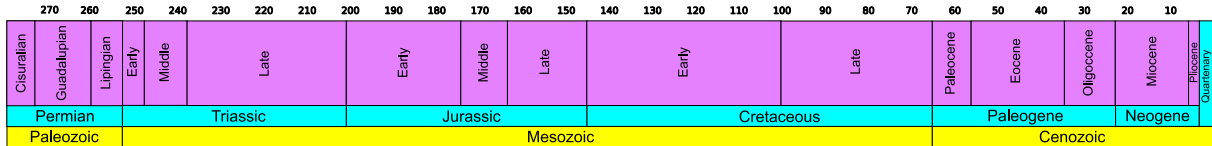

Dermomyssiae

Parasitiae
